# Supplementary material for: Dynamic reversibility of hydrodynamic focusing for recycling sheath fluid
Source: Royal Society of Chemistry journal article supplement (doi:10.1039/c004696e), 2010-01-01
Supplement: c004696e.pdf [file c004696e.pdf]

**Reversibility of hydrodynamic focusing for recycling sheath fluid**

Nastaran Hashemi, Peter B. Howell, Joel P. Golden, Jeffrey S. Erickson, Frances S. Ligler

**SUPPLEMENTAL INFORMATION**

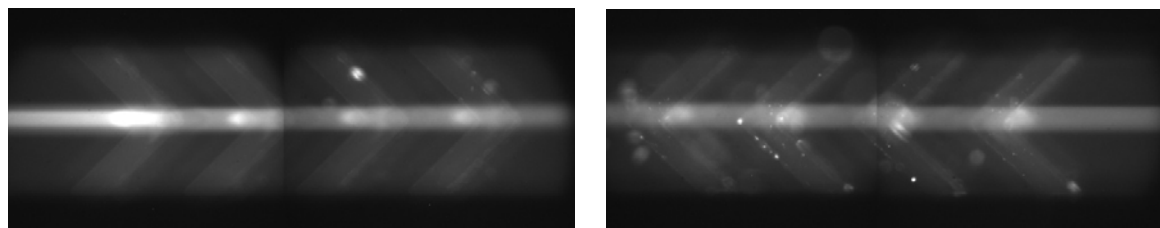

Figure A1. Left figure shows the inlet chevrons and right figure shows the reversed chevrons placed after interrogation region. The sample stream includes a fluorescent dye.

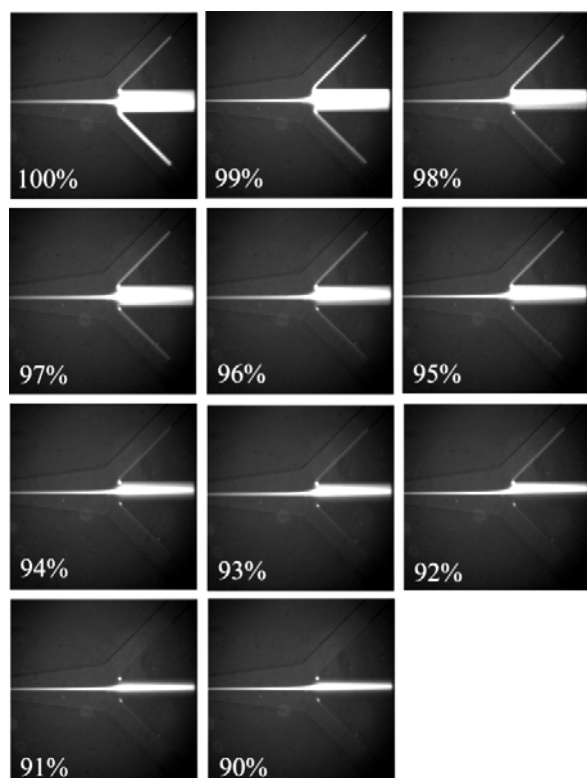

Figure A2. Images of outlet channels at 100% to 90% recycled sheath fluid containing fluorescent dye. Images are taken using a Nikon fluorescent microscope.
